# Supplementary material for: Lack of scarring is not always a sign of cardiac health: Functional and molecular characterization of the rat heart’s following chronic reperfusion
Source: PLoS One. 2018 Dec 20;13(12):e0209190. doi: 10.1371/journal.pone.0209190 (PMC6301775; doi:10.1371/journal.pone.0209190)
Supplement: S2 File — Midventricular cross-sections of the left ventricle stained with picrosirius red for the quantification of interstitial collagen fibers. (XLSX) [file pone.0209190.s002.xlsx]

## Sheet: Septal collagen - Sham
Sham

## Sheet: Septal collagen - IR(NL)
IR (NL)

## Sheet: Septal collagen - IR(ML)
IR (ML)

## Sheet: Septal collagen -  IR(LL)
IR(LL)
